# Supplementary material for: Microfluidics without pumps: reinventing the T-sensor and H-filter in paper networks
Source: Royal Society of Chemistry journal article supplement (doi:10.1039/c004821f), 2010-01-01
Supplement: c004821f.pdf [file c004821f.pdf]

## Supplementary Figures

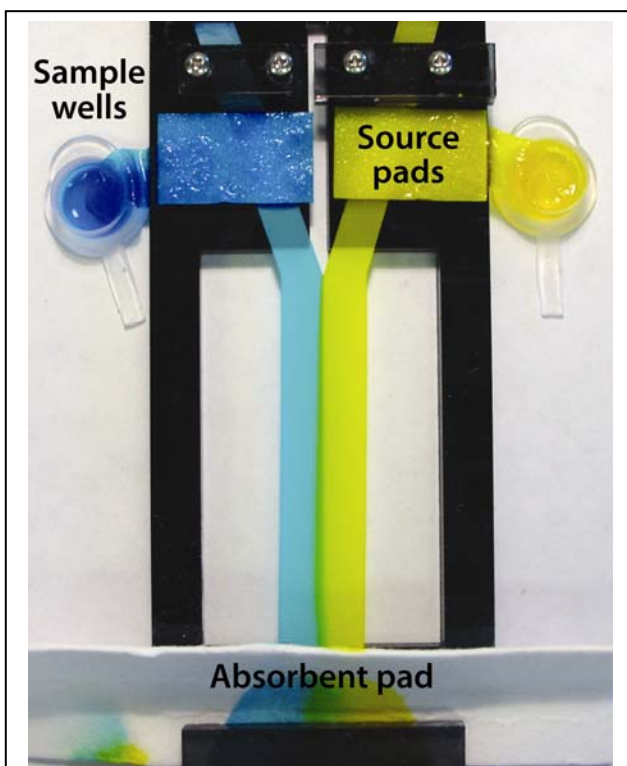

**Fig S1.** An image of a fully assembled 2DPN showing the sample wells, PMMA jig, source pads and absorbent pad.

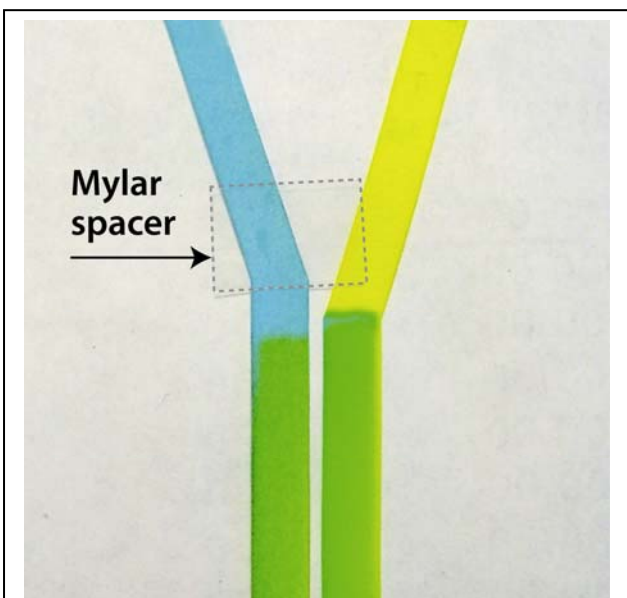

**Fig S2.** Disassembled flat paper Y-mixer. Note that there was ~1 min between disassembly and image acquisition. Dashed line demarcates placement of the clear Mylar spacer.

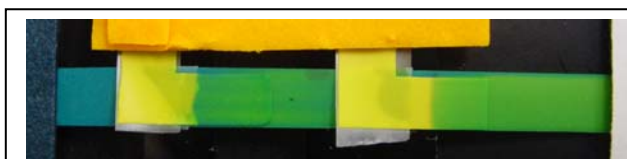

**Fig S3.** Serial dilution in a paper device. Left inlet contains erioglaucine and top inlets contain tartrazine.
